# Supplementary material
Source: PubMed Central journal article supplement (PMC4304734)
Supplement: embr0016-0107-sd1.pdf [file embr0016-0107-sd1.pdf]

## SUPPLEMENTARY INFORMATION

### **Functional analysis of related CrRLK1L receptor-like kinases in pollen tube reception**

Sharon A Kessler, Heike Lindner, Daniel S Jones & Ueli Grossniklaus

### **Supplementary Figures**

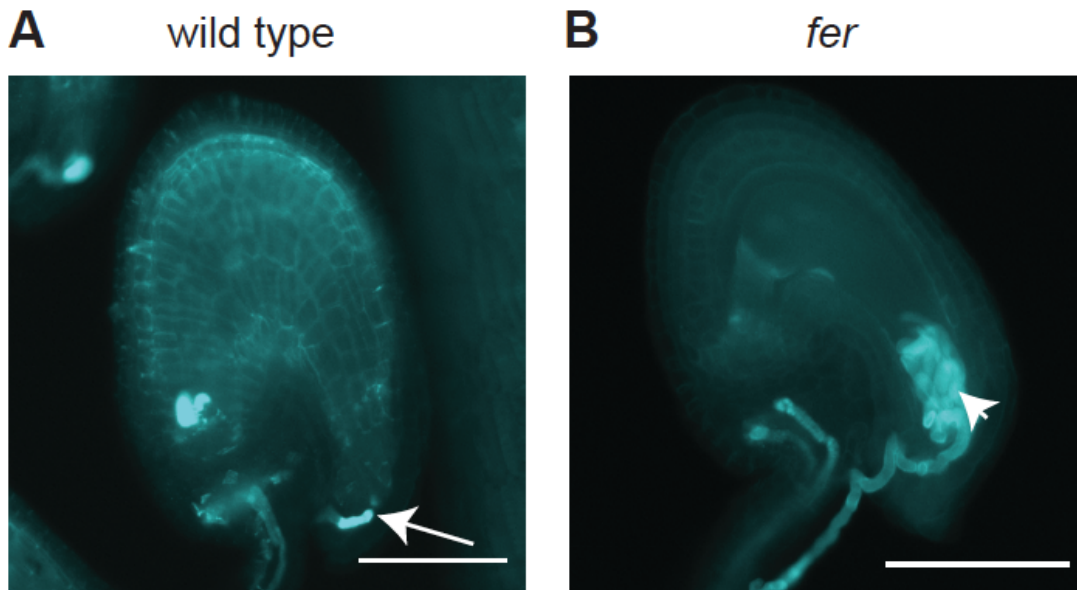

#### **Supplementary Figure S1. PT reception is disrupted in *fer* mutants.**

Aniline blue staining of PTs in wild-type (A) and *fer-1* (B) ovules. Arrow indicates normal PT reception and arrowhead indicates PT overgrowth. Staining was performed according to [1].



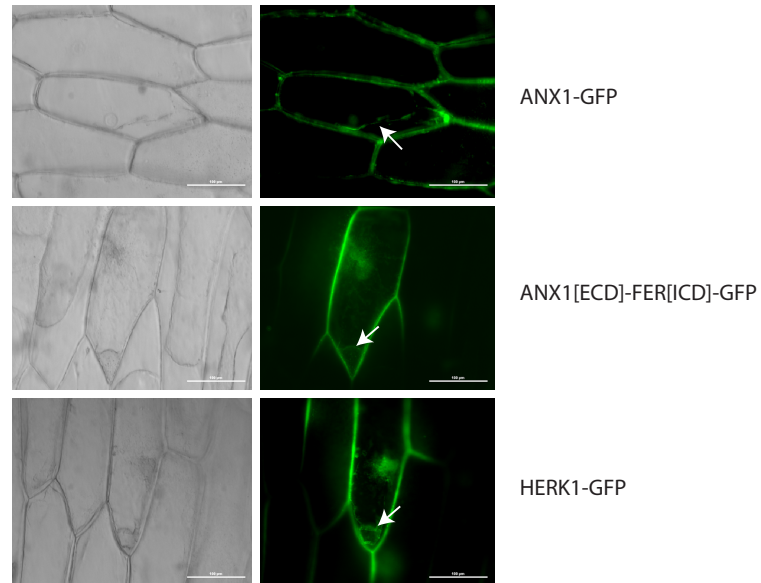

**Supplementary Figure S3. Membrane localization of GFP fusion proteins in onion epidermal cells.**

Left panels, DIC images of onion epidermal cells plasmolyzed in 30% sucrose. Right panels, transient GFP fusion protein expression. Arrows indicate GFP signal in plasma membrane that has retracted from the cell wall upon plasmolysis. Transient onion infections were done with *Agrobacterium tumefaciens* strains carrying the GFP constructs described in Materials and Methods according to the protocol described in [2].

|                   | Subdomain I      | II                                                      | III               |
|-------------------|------------------|---------------------------------------------------------|-------------------|
| AtCLV1   692-751  | LKEENII          | <b>GKGGAGI</b> VYRGSMPNNV-DVAIKRLVGRG-TGRS-DHGFTA       | EIQTLGRIRRRHIVR-  |
| AtFLS2   870-929  | FNSANI           | <b>IGSSSL</b> STVYKQLEDGT-VIAVKVLNLKEFSAES-DKWFYTEAKT   | LSQLKHRNLV--      |
| AtACR4   512-571  | FKEESI           | <b>VGKGSF</b> SCVYKGLRDGT-TVAVKRAIMSSDKQKN-SNEFRTELD    | LLSRLNHAHLL--     |
| AtBRI1   883-942  | FHNSLI           | <b>IGSGG</b> FDVYKAILKDGS-AVAIKKLIHVS--GQG-DREFMAEMETIG | KIKHRNLVPL        |
| AtANX1   517-576  | FDDSNV           | <b>IGVGG</b> FGKVYKGVIDG-TTKVAVKKNPNS--EQG-LNEFETE      | IELLSRLRHKHLVSL   |
| AtFER   536-595   | FDESRV           | <b>LGVGG</b> FGKVYRGEIDGGTTKVAIKRGNPMS--EQG-VHEFQTE     | IEMLSKLRRHRLVS-   |
| AtHERK1   485-544 | FDESRN           | <b>IGVGG</b> FGKVYKGEINDGT-KVAVKRGPNKS--QQG-LAEFRTE     | IEMLSQFRHRLVSL    |
| DmCDK1   4-63     | FEKIEKI          | <b>IGEGTY</b> GVVYKGRNRLTGQIVAMKKIRLES-DEGVPSTAI        | REISLLKELKHENI--- |
| ScSNF1   55-114   | YQIVKTL          | <b>IGEGS</b> FGKVKLAYHTTGGQVALKI INKKVLAKSDMQGRIERE     | ISYLRLLRHPH----   |
|                   | .    : * . . * . | : : * :                                                 | * . : : * .       |

**Supplementary Figure S4. FER, HERK1, and ANX1 have typical kinase domains.**

Amino acid alignment of the first 60 amino acids of kinase domains from *Arabidopsis* RLKs, and *Drosophila* CDK1, and yeast SNF1 kinases. Subdomains are defined based on [3]. The subdomain II critical K of the highly conserved ATP-binding site is highlighted in green, the nearly conserved glycine loop in subdomain I of kinases is shown in yellow, and the conserved E in subdomain II, which forms a salt bridge with the critical K [3], is highlighted in blue. The K565 residue was changed to R, A, and E in FER and all three changes complemented the *fer* phenotype (Fig 4B). A K911E change in BRI1 abolished kinase activity and resulted in a dwarf phenotype [4] and K560L, M, and W changes in ACR4 all led to loss of kinase activity [5-7]. Amino acid sequences and locations of predicted kinase domains were downloaded from the Universal Protein Resource (uniProt) database (CLV1, [Q9SYQ8](#); FLS2, [Q9FL28](#); ACR4, [Q9LX29](#); BRI1, [O22476](#); ANX1, [Q9SR05](#); FER, [Q9SCZ4](#); HERK1, [Q9LX66](#); CDK1, [P23572](#); SNF1, [P06782](#)).

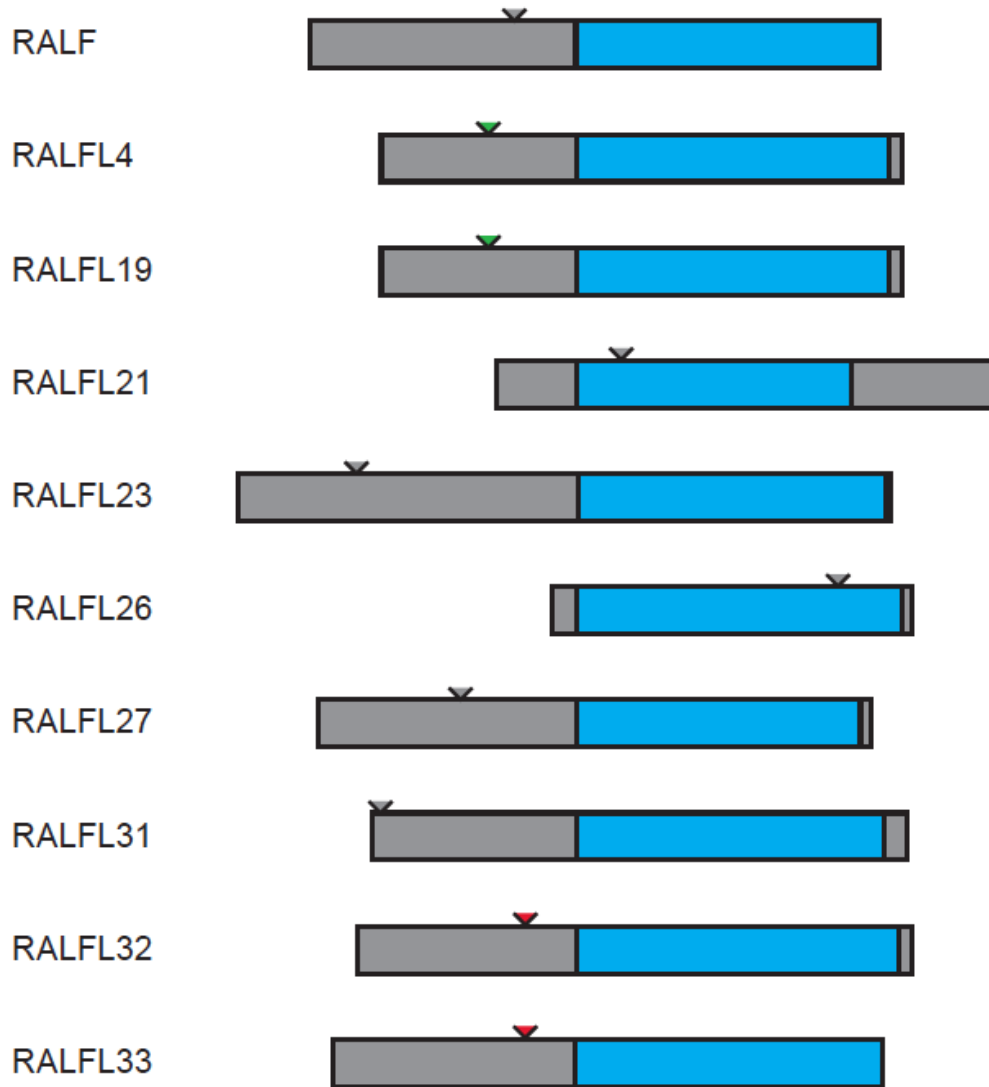

**Supplementary Figure S5. Potential glycosylation sites in RALF and RALFL-like peptides.**

RALF and RALFL peptides were analyzed for potential glycosylation sites with the NetNGlyc 1.0 Server (<http://www.cbs.dtu.dk/services/NetNGlyc/>). The 10 peptides with predicted glycosylation sites are shown with the RALF domain (predicted by PFAM analysis) in blue. Conserved glycosylation sites are red and green, while non-conserved sites are in grey. Peptides shown are before potential processing by a protease, which may remove some of the putative glycosylation sites. RALF and RALFL23 were shown to be processed by a Site-1 protease (S1P) [8,9]. Pollen expressed RALFL4 and RALFL26 do not have the motif for S1P recognition, but might be processed by other proteases.

## Supplementary Tables

**Supplementary Table S1: Seed count data from domain swap complementation experiment (see also Figure 3)**

| Construct                                | Plant number | genotype           | unfertilized ovules | fertilized ovules | % unfertilized |
|------------------------------------------|--------------|--------------------|---------------------|-------------------|----------------|
| Ler untransformed control                | Ler-1        | <i>FER/FER</i>     | 11                  | 355               | 3.0            |
|                                          | Ler-2        | <i>FER/FER</i>     | 13                  | 338               | 3.7            |
|                                          | Ler-3        | <i>FER/FER</i>     | 4                   | 357               | 1.1            |
|                                          | Ler-4        | <i>FER/FER</i>     | 4                   | 363               | 1.1            |
|                                          | Ler-5        | <i>FER/FER</i>     | 5                   | 469               | 1.1            |
|                                          | Ler-6        | <i>FER/FER</i>     | 21                  | 442               | 4.5            |
|                                          | Ler-7        | <i>FER/FER</i>     | 7                   | 457               | 1.5            |
| <i>fer-1/FER</i> untransformed control   | SAK543-1     | <i>fer-1/FER</i>   | 171                 | 234               | 42.2           |
|                                          | SAK543-2     | <i>fer-1/FER</i>   | 135                 | 221               | 37.9           |
|                                          | SAK543-3     | <i>fer-1/FER</i>   | 169                 | 203               | 45.4           |
|                                          | SAK543-4     | <i>fer-1/FER</i>   | 176                 | 224               | 44.0           |
|                                          | SAK543-5     | <i>fer-1/FER</i>   | 178                 | 207               | 46.2           |
|                                          | SAK543-6     | <i>fer-1/FER</i>   | 187                 | 234               | 44.4           |
|                                          | SAK543-7     | <i>fer-1/FER</i>   | 192                 | 225               | 46.0           |
|                                          | SAK543-8     | <i>fer-1/FER</i>   | 147                 | 208               | 41.4           |
| <i>fer-1/fer-1</i> untransformed control | SAK534-1     | <i>fer-1/fer-1</i> | 267                 | 53                | 83.4           |
|                                          | SAK534-2     | <i>fer-1/fer-1</i> | 262                 | 50                | 84.0           |
|                                          | SAK534-3     | <i>fer-1/fer-1</i> | 200                 | 41                | 83.0           |
|                                          | SAK534-4     | <i>fer-1/fer-1</i> | 203                 | 50                | 80.2           |
| <i>pFER::FER-GFP/-</i> (complements)     | SAK836-31    | <i>fer-1/FER</i>   | 66                  | 220               | 23.1           |
|                                          | SAK836-30    | <i>fer-1/FER</i>   | 75                  | 241               | 23.7           |
|                                          | SAK836-35    | <i>fer-1/FER</i>   | 62                  | 231               | 21.2           |
|                                          | SAK836-42    | <i>fer-1/FER</i>   | 66                  | 243               | 21.3           |
|                                          | SAK836-44    | <i>fer-1/FER</i>   | 69                  | 211               | 24.6           |
|                                          | SAK836-39    | <i>fer-1/fer-1</i> | 101                 | 112               | 47.4           |
|                                          | SAK836-40    | <i>fer-1/fer-1</i> | 72                  | 100               | 41.9           |
|                                          | SAK836-45    | <i>fer-1/fer-1</i> | 103                 | 135               | 43.3           |
| <i>pFER::ANX1-GFP/-</i>                  | SAK540-2     | <i>FER/FER</i>     | 8                   | 407               | 1.9            |

(does not complement)

|           |                  |     |     |      |
|-----------|------------------|-----|-----|------|
| SAK540-3  | <i>FER/FER</i>   | 11  | 281 | 3.8  |
| SAK540-7  | <i>FER/FER</i>   | 19  | 319 | 5.6  |
| SAK540-10 | <i>FER/FER</i>   | 12  | 422 | 2.8  |
| SAK540-11 | <i>FER/FER</i>   | 15  | 425 | 3.4  |
| SAK540-12 | <i>FER/FER</i>   | 16  | 342 | 4.5  |
| SAK540-13 | <i>FER/FER</i>   | 22  | 382 | 5.4  |
| SAK540-19 | <i>FER/FER</i>   | 25  | 382 | 6.1  |
| SAK540-24 | <i>FER/FER</i>   | 20  | 312 | 6.0  |
| SAK540-26 | <i>FER/FER</i>   | 12  | 375 | 3.1  |
| SAK540-30 | <i>FER/FER</i>   | 14  | 407 | 3.3  |
| SAK540-1  | <i>fer-1/FER</i> | 141 | 210 | 40.2 |
| SAK540-8  | <i>fer-1/FER</i> | 148 | 169 | 46.7 |
| SAK540-15 | <i>fer-1/FER</i> | 159 | 226 | 41.3 |
| SAK540-16 | <i>fer-1/FER</i> | 152 | 220 | 40.9 |
| SAK540-20 | <i>fer-1/FER</i> | 152 | 206 | 42.5 |
| SAK540-23 | <i>fer-1/FER</i> | 171 | 220 | 43.7 |
| SAK540-25 | <i>fer-1/FER</i> | 170 | 238 | 41.7 |
| SAK540-28 | <i>fer-1/FER</i> | 162 | 235 | 40.8 |

*pFER::ANX1[ECD]-  
FER[ICD]-GFP/-*  
(does not complement)

|           |                  |     |     |      |
|-----------|------------------|-----|-----|------|
| SAK537-1  | <i>FER/FER</i>   | 11  | 347 | 3.1  |
| SAK537-3  | <i>FER/FER</i>   | 10  | 373 | 2.6  |
| SAK537-4  | <i>FER/FER</i>   | 21  | 337 | 5.9  |
| SAK537-5  | <i>FER/FER</i>   | 21  | 331 | 6.0  |
| SAK537-8  | <i>FER/FER</i>   | 12  | 388 | 3.0  |
| SAK537-9  | <i>FER/FER</i>   | 21  | 388 | 5.1  |
| SAK537-10 | <i>FER/FER</i>   | 24  | 408 | 5.6  |
| SAK537-2  | <i>fer-1/FER</i> | 94  | 121 | 43.7 |
| SAK537-6  | <i>fer-1/FER</i> | 184 | 240 | 43.4 |
| SAK537-7  | <i>fer-1/FER</i> | 175 | 200 | 46.7 |
| SAK537-26 | <i>fer-1/FER</i> | 113 | 161 | 41.2 |
| SAK537-27 | <i>fer-1/FER</i> | 122 | 165 | 42.5 |
| SAK537-30 | <i>fer-1/FER</i> | 98  | 132 | 42.6 |
| SAK537-38 | <i>fer-1/FER</i> | 79  | 126 | 38.5 |

*pFER::FER[ECD]-  
ANX1[ICD]-GFP/-*  
(complements)

|           |                |    |     |      |
|-----------|----------------|----|-----|------|
| SAK538-1  | <i>FER/FER</i> | 35 | 307 | 10.2 |
| SAK538-7  | <i>FER/FER</i> | 22 | 386 | 5.4  |
| SAK538-12 | <i>FER/FER</i> | 11 | 368 | 2.9  |
| SAK538-18 | <i>FER/FER</i> | 15 | 408 | 3.5  |
| SAK538-19 | <i>FER/FER</i> | 22 | 401 | 5.2  |
| SAK538-20 | <i>FER/FER</i> | 12 | 420 | 2.8  |

|           |                    |     |     |      |
|-----------|--------------------|-----|-----|------|
| SAK538-23 | <i>FER/FER</i>     | 18  | 436 | 4.0  |
| SAK538-2  | <i>fer-1/FER</i>   | 89  | 317 | 21.9 |
| SAK538-3  | <i>fer-1/FER</i>   | 101 | 257 | 28.2 |
| SAK538-13 | <i>fer-1/FER</i>   | 103 | 332 | 23.7 |
| SAK538-24 | <i>fer-1/FER</i>   | 111 | 301 | 26.9 |
| SAK538-27 | <i>fer-1/FER</i>   | 95  | 263 | 26.5 |
| SAK538-4  | <i>fer-1/fer-1</i> | 172 | 231 | 42.7 |
| SAK538-8  | <i>fer-1/fer-1</i> | 151 | 181 | 45.5 |
| SAK538-17 | <i>fer-1/fer-1</i> | 153 | 224 | 40.6 |

*pFER::HERK1-GFP/-  
(does not complement)*

|           |                  |     |     |      |
|-----------|------------------|-----|-----|------|
| SAK541-1  | <i>FER/FER</i>   | 19  | 324 | 5.5  |
| SAK541-3  | <i>FER/FER</i>   | 16  | 388 | 4.0  |
| SAK541-4  | <i>FER/FER</i>   | 16  | 395 | 3.9  |
| SAK541-9  | <i>FER/FER</i>   | 19  | 334 | 5.4  |
| SAK541-13 | <i>FER/FER</i>   | 15  | 304 | 4.7  |
| SAK541-24 | <i>FER/FER</i>   | 16  | 376 | 4.1  |
| SAK541-26 | <i>FER/FER</i>   | 19  | 389 | 4.7  |
| SAK541-6  | <i>fer-1/FER</i> | 155 | 253 | 38.0 |
| SAK541-7  | <i>fer-1/FER</i> | 166 | 224 | 42.6 |
| SAK541-10 | <i>fer-1/FER</i> | 153 | 212 | 41.9 |
| SAK541-16 | <i>fer-1/FER</i> | 180 | 220 | 45.0 |
| SAK541-23 | <i>fer-1/FER</i> | 152 | 228 | 40.0 |
| SAK541-25 | <i>fer-1/FER</i> | 165 | 209 | 44.1 |

*pFER::FER[ECD]-  
HERK1[ICD]-GFP/-  
(complements)*

|           |                  |    |     |      |
|-----------|------------------|----|-----|------|
| SAK539-3  | <i>FER/FER</i>   | 14 | 416 | 3.3  |
| SAK539-5  | <i>FER/FER</i>   | 34 | 392 | 8.0  |
| SAK539-7  | <i>FER/FER</i>   | 25 | 386 | 6.1  |
| SAK539-10 | <i>FER/FER</i>   | 66 | 345 | 16.1 |
| SAK539-11 | <i>FER/FER</i>   | 20 | 413 | 4.6  |
| SAK539-12 | <i>FER/FER</i>   | 33 | 364 | 8.3  |
| SAK539-15 | <i>FER/FER</i>   | 23 | 396 | 5.5  |
| SAK539-16 | <i>FER/FER</i>   | 15 | 420 | 3.4  |
| SAK539-2  | <i>fer-1/FER</i> | 94 | 252 | 27.2 |
| SAK539-6  | <i>fer-1/FER</i> | 83 | 272 | 23.4 |
| SAK539-9  | <i>fer-1/FER</i> | 91 | 270 | 25.2 |
| SAK539-27 | <i>fer-1/FER</i> | 63 | 277 | 18.5 |
| SAK539-28 | <i>fer-1/FER</i> | 85 | 171 | 33.2 |
| SAK539-29 | <i>fer-1/FER</i> | 81 | 242 | 25.1 |
| SAK539-33 | <i>fer-1/FER</i> | 70 | 291 | 19.4 |
| SAK539-39 | <i>fer-1/FER</i> | 69 | 182 | 27.5 |
| SAK539-40 | <i>fer-1/FER</i> | 38 | 205 | 15.6 |



|           |                    |     |     |      |
|-----------|--------------------|-----|-----|------|
| SAK539-44 | <i>fer-1/FER</i>   | 59  | 146 | 28.8 |
| SAK539-45 | <i>fer-1/FER</i>   | 48  | 166 | 22.4 |
| SAK539-46 | <i>fer-1/FER</i>   | 125 | 373 | 25.1 |
| SAK539-8  | <i>fer-1/fer-1</i> | 143 | 178 | 44.5 |
| SAK539-9  | <i>fer-1/fer-1</i> | 160 | 157 | 50.5 |
| SAK539-14 | <i>fer-1/fer-1</i> | 143 | 147 | 49.3 |
| SAK539-19 | <i>fer-1/fer-1</i> | 127 | 196 | 39.3 |
| SAK539-21 | <i>fer-1/fer-1</i> | 154 | 180 | 46.1 |

|                                                     |           |                  |     |     |      |
|-----------------------------------------------------|-----------|------------------|-----|-----|------|
| <i>pFER::FERΔICD-GFP/-</i><br>(does not complement) | SAK542-3  | <i>FER/FER</i>   | 21  | 349 | 5.7  |
|                                                     | SAK542-4  | <i>FER/FER</i>   | 28  | 319 | 8.1  |
|                                                     | SAK542-6  | <i>FER/FER</i>   | 6   | 271 | 2.2  |
|                                                     | SAK542-7  | <i>FER/FER</i>   | 11  | 271 | 3.9  |
|                                                     | SAK542-9  | <i>FER/FER</i>   | 5   | 270 | 1.8  |
|                                                     | SAK542-1  | <i>fer-1/FER</i> | 151 | 222 | 40.5 |
|                                                     | SAK542-2  | <i>fer-1/FER</i> | 172 | 217 | 44.2 |
|                                                     | SAK542-3  | <i>fer-1/FER</i> | 133 | 147 | 47.5 |
|                                                     | SAK542-4  | <i>fer-1/FER</i> | 145 | 181 | 44.5 |
|                                                     | SAK542-5  | <i>fer-1/FER</i> | 175 | 134 | 56.6 |
|                                                     | SAK542-7  | <i>fer-1/FER</i> | 196 | 217 | 47.5 |
|                                                     | SAK542-10 | <i>fer-1/FER</i> | 91  | 158 | 36.5 |
|                                                     | SAK542-11 | <i>fer-1/FER</i> | 131 | 175 | 42.8 |
|                                                     | SAK542-15 | <i>fer-1/FER</i> | 121 | 178 | 40.5 |
|                                                     | SAK542-18 | <i>fer-1/FER</i> | 75  | 72  | 51.0 |
|                                                     | SAK542-20 | <i>fer-1/FER</i> | 124 | 199 | 38.4 |
|                                                     | SAK542-21 | <i>fer-1/FER</i> | 120 | 166 | 42.0 |
|                                                     | SAK542-23 | <i>fer-1/FER</i> | 93  | 164 | 36.2 |
|                                                     | SAK542-24 | <i>fer-1/FER</i> | 99  | 173 | 36.4 |

|                                                                |           |                  |     |     |      |
|----------------------------------------------------------------|-----------|------------------|-----|-----|------|
| <i>pFER::FER[ECD]-BRI1[ICD]-GFP/-</i><br>(does not complement) | SAK837-3  | <i>FER/FER</i>   | 30  | 211 | 12.4 |
|                                                                | SAK837-17 | <i>FER/FER</i>   | 19  | 241 | 7.3  |
|                                                                | SAK837-13 | <i>FER/FER</i>   | 17  | 238 | 6.7  |
|                                                                | SAK837-1  | <i>fer-1/FER</i> | 94  | 164 | 36.4 |
|                                                                | SAK837-4  | <i>fer-1/FER</i> | 102 | 167 | 37.9 |
|                                                                | SAK837-5  | <i>fer-1/FER</i> | 107 | 143 | 42.8 |
|                                                                | SAK837-7  | <i>fer-1/FER</i> | 111 | 143 | 43.7 |
|                                                                | SAK837-8  | <i>fer-1/FER</i> | 94  | 163 | 36.6 |
|                                                                | SAK837-9  | <i>fer-1/FER</i> | 107 | 169 | 38.8 |
|                                                                | SAK837-11 | <i>fer-1/FER</i> | 94  | 158 | 37.3 |

**Supplementary Table S2: Seed count data from FER point mutation complementation experiments (see also Figure 4).**

| Construct                                    | line number | genotype           | unfertilized ovules | fertilized ovules | % unfertilized |
|----------------------------------------------|-------------|--------------------|---------------------|-------------------|----------------|
| Ler untransformed control                    | Ler-1       | <i>FER/FER</i>     | 14                  | 330               | 4.1            |
|                                              | Ler-2       | <i>FER/FER</i>     | 7                   | 315               | 2.2            |
|                                              | Ler-3       | <i>FER/FER</i>     | 15                  | 322               | 4.5            |
| <i>fer-1/FER</i> untransformed control       | SAK433-1    | <i>fer-1/FER</i>   | 149                 | 232               | 39.1           |
|                                              | SAK433-2    | <i>fer-1/FER</i>   | 157                 | 221               | 41.5           |
|                                              | SAK433-3    | <i>fer-1/FER</i>   | 155                 | 220               | 41.3           |
|                                              | SAK433-4    | <i>fer-1/FER</i>   | 154                 | 230               | 40.1           |
|                                              | SAK433-5    | <i>fer-1/FER</i>   | 159                 | 245               | 39.4           |
|                                              | SAK433-6    | <i>fer-1/FER</i>   | 151                 | 256               | 37.1           |
|                                              | SAK433-7    | <i>fer-1/FER</i>   | 126                 | 198               | 38.9           |
| <i>fer-1/fer-1</i> untransformed control     | SAK429-1    | <i>fer-1/fer-1</i> | 141                 | 33                | 81.0           |
|                                              | SAK429-2    | <i>fer-1/fer-1</i> | 153                 | 39                | 79.7           |
|                                              | SAK429-3    | <i>fer-1/fer-1</i> | 138                 | 39                | 78.0           |
|                                              | SAK429-4    | <i>fer-1/fer-1</i> | 159                 | 33                | 82.8           |
|                                              | SAK429-5    | <i>fer-1/fer-1</i> | 168                 | 39                | 81.2           |
| <i>pFER::FER[K-R]-GFP/-</i><br>(complements) | SAK91-3     | <i>FER/FER</i>     | 14                  | 336               | 4.0            |
|                                              | SAK91-6     | <i>FER/FER</i>     | 12                  | 387               | 3.0            |
|                                              | SAK91-7     | <i>FER/FER</i>     | 16                  | 302               | 5.0            |
|                                              | SAK91-2     | <i>fer-1/FER</i>   | 103                 | 310               | 24.9           |
|                                              | SAK91-5     | <i>fer-1/FER</i>   | 84                  | 338               | 19.9           |
|                                              | SAK91-9     | <i>fer-1/FER</i>   | 78                  | 268               | 22.5           |
|                                              | SAK116-2    | <i>fer-1/fer-1</i> | 91                  | 130               | 41.2           |
|                                              | SAK116-3    | <i>fer-1/fer-1</i> | 81                  | 102               | 44.3           |
|                                              | SAK118-5    | <i>fer-1/fer-1</i> | 86                  | 129               | 40.0           |
|                                              | SAK118-6    | <i>fer-1/fer-1</i> | 88                  | 128               | 40.7           |
| <i>pFER::FER[K-A]-GFP/-</i><br>(complements) | SAK839-5    | <i>fer-1/FER</i>   | 73                  | 167               | 30.4           |
|                                              | SAK839-9    | <i>fer-1/FER</i>   | 75                  | 214               | 26.0           |
|                                              | SAK839-12   | <i>fer-1/FER</i>   | 54                  | 226               | 19.3           |
|                                              | SAK839-15   | <i>fer-1/FER</i>   | 77                  | 213               | 26.6           |
|                                              | SAK839-20   | <i>fer-1/FER</i>   | 73                  | 222               | 24.7           |
|                                              | SAK839-10   | <i>fer-1/FER</i>   | 64                  | 228               | 21.9           |

|                                                           |           |                    |     |     |      |
|-----------------------------------------------------------|-----------|--------------------|-----|-----|------|
|                                                           | SAK839-11 | <i>fer-1/fer-1</i> | 126 | 160 | 44.1 |
|                                                           | SAK839-27 | <i>fer-1/fer-1</i> | 100 | 156 | 39.1 |
| <i>pFER::FER[K-E]-GFP/-<br/>(complements)</i>             | SAK840-6  | <i>fer-1/FER</i>   | 59  | 182 | 24.5 |
|                                                           | SAK840-19 | <i>fer-1/FER</i>   | 70  | 185 | 27.5 |
|                                                           | SAK840-23 | <i>fer-1/FER</i>   | 64  | 205 | 23.8 |
|                                                           | SAK840-27 | <i>fer-1/FER</i>   | 75  | 206 | 26.7 |
|                                                           | SAK840-10 | <i>fer-1/fer-1</i> | 100 | 88  | 53.2 |
| <i>pFER::FER[STS-AAA]-GFP/-<br/>(complements)</i>         | SAK309-3  | <i>fer-1/FER</i>   | 50  | 117 | 29.9 |
|                                                           | SAK309-5  | <i>fer-1/FER</i>   | 50  | 168 | 22.9 |
|                                                           | SAK393-1  | <i>fer-1/FER</i>   | 103 | 279 | 27.0 |
|                                                           | SAK393-2  | <i>fer-1/FER</i>   | 74  | 323 | 18.6 |
|                                                           | SAK393-3  | <i>fer-1/FER</i>   | 75  | 255 | 22.7 |
|                                                           | SAK393-4  | <i>fer-1/FER</i>   | 74  | 239 | 23.6 |
| <i>pFER::FER[STS-DDD]-GFP/-<br/>(does not complement)</i> | SAK92-2   | <i>FER/FER</i>     | 12  | 288 | 4.0  |
|                                                           | SAK92-6   | <i>FER/FER</i>     | 5   | 190 | 2.6  |
|                                                           | SAK92-7   | <i>FER/FER</i>     | 6   | 203 | 2.9  |
|                                                           | SAK92-8   | <i>FER/FER</i>     | 9   | 180 | 4.8  |
|                                                           | SAK92-12  | <i>FER/FER</i>     | 9   | 221 | 3.9  |
|                                                           | SAK446-2  | <i>fer-1/FER</i>   | 159 | 220 | 42.0 |
|                                                           | SAK446-4  | <i>fer-1/FER</i>   | 146 | 208 | 41.2 |
|                                                           | SAK446-11 | <i>fer-1/FER</i>   | 151 | 190 | 44.3 |
|                                                           | SAK446-14 | <i>fer-1/FER</i>   | 150 | 221 | 40.4 |
|                                                           | SAK446-15 | <i>fer-1/FER</i>   | 144 | 201 | 41.7 |
|                                                           | SAK446-16 | <i>fer-1/FER</i>   | 142 | 222 | 39.0 |
|                                                           | SAK446-17 | <i>fer-1/FER</i>   | 164 | 224 | 42.3 |
|                                                           | SAK446-18 | <i>fer-1/FER</i>   | 156 | 218 | 41.7 |
|                                                           | SAK446-20 | <i>fer-1/FER</i>   | 141 | 231 | 37.9 |
| <i>pFER::FER[S695A]-GFP/-<br/>(complements)</i>           | SAK305-1  | <i>fer-1/FER</i>   | 38  | 118 | 24.4 |
|                                                           | SAK305-2  | <i>fer-1/FER</i>   | 36  | 117 | 23.5 |
|                                                           | SAK305-4  | <i>fer-1/FER</i>   | 43  | 127 | 25.3 |
| <i>pFER::FER[T696A]-GFP/-<br/>(complements)</i>           | SAK306-3  | <i>fer-1/FER</i>   | 47  | 103 | 31.3 |
|                                                           | SAK306-4  | <i>fer-1/FER</i>   | 53  | 118 | 31.0 |
|                                                           | SAK306-5  | <i>fer-1/FER</i>   | 44  | 125 | 26.0 |
| <i>pFER::FER[S701A]-GFP/-<br/>(complements)</i>           | SAK308-1  | <i>fer-1/FER</i>   | 44  | 168 | 20.8 |
|                                                           | SAK308-3  | <i>fer-1/FER</i>   | 38  | 145 | 20.8 |

|                                                      |           |                    |    |     |      |
|------------------------------------------------------|-----------|--------------------|----|-----|------|
| <i>pFER::FER[S695A-T696A]-GFP/-</i><br>(complements) | SAK307-3  | <i>fer-1/FER</i>   | 34 | 167 | 16.9 |
|                                                      | SAK307-4  | <i>fer-1/FER</i>   | 36 | 194 | 15.7 |
| <i>pFER::FER[S695D]-GFP/-</i><br>(complements)       | SAK96-1   | <i>fer-1/fer-1</i> | 74 | 81  | 47.7 |
|                                                      | SAK96-4   | <i>fer-1/fer-1</i> | 69 | 73  | 48.6 |
|                                                      | SAK96-5   | <i>fer-1/FER</i>   | 56 | 164 | 25.5 |
| <i>pFER::FER[T696D]-GFP/-</i><br>(complements)       | SAK123-1  | <i>fer-1/fer-1</i> | 71 | 80  | 47.0 |
|                                                      | SAK123-2  | <i>fer-1/fer-1</i> | 56 | 71  | 44.1 |
| <i>pFER::FER[S701D]-GFP/-</i><br>(complements)       | SAK124-1  | <i>fer-1/FER</i>   | 52 | 179 | 22.5 |
|                                                      | SAK124-7  | <i>fer-1/FER</i>   | 42 | 141 | 23.0 |
|                                                      | SAK124-28 | <i>fer-1/fer-1</i> | 46 | 58  | 44.2 |
| <i>pFER::FER[S695D-T696D]-GFP/-</i><br>(complements) | SAK122-2  | <i>fer-1/fer-1</i> | 71 | 74  | 49.0 |
|                                                      | SAK122-5  | <i>fer-1/fer-1</i> | 76 | 76  | 50.0 |
|                                                      | SAK122-6  | <i>fer-1/fer-1</i> | 67 | 77  | 46.5 |

**Supplementary Table S3: Primers used to generate complementation constructs**

| Primer name     | Sequence                                                   |
|-----------------|------------------------------------------------------------|
| SKpromFER-attB1 | ggggacaagttgtacaaaaaagcaggctggtaagcttcgatttaagcg           |
| promFER-R       | cgatcaagagcacttctccg                                       |
| FERIC-F         | gctattattgcaggcgcagc                                       |
| attB2FERIC-R    | ggggaccactttgtacaagaaagctgggtacgtcccttggattcatgatc         |
| FEREC-R         | cgtattgcttttcgatttct                                       |
| ANX1FER-F       | cggagaagtgccttgatcgatgagcgggaaaactcggattc                  |
| ANX1FER-R       | actggctgcgcctgcaataatagcgtgtctctttcgttcttg                 |
| FERANX1-F       | aggaaatcgaaaagcaatacggcttcatcattggttcggc                   |
| attB2ANX1-R     | ggggaccactttgtacaagaaagctgggttcgtccttgggatttacaatc         |
| HERK1FER-F      | cggagaagtgccttgatcgatgggtattgaaaagttgaaac                  |
| HERK1FER-R      | actggctgcgcctgcaataatagcccgagattactcttactgc                |
| FERHERK1-F      | aggaaatcgaaaagcaatacgtgattgtaggttcagccat                   |
| attB2HERK1-R    | ggggaccactttgtacaagaaagctgggttcttccttcagatttcaccag         |
| SKFER-17FattB1  | aaaaagcaggcttcggaagcttcgatttaagcg                          |
| SKFER-15RattB2  | agaaagctgggtgaccaccaacaccaagcacc                           |
| SKFERcdBRI-F    | aggaaatcgaaaagcaatacggctggtagtggtggcggatgg                 |
| SKBRI1-attB2    | ggggaccactttgtacaagaaagctgggttaattttccttcaggaaacttctttatac |

**Supplementary Table S4: Primer combinations used for fusion constructs**

| <b>Construct</b>                                  | <b>Primers</b>  |
|---------------------------------------------------|-----------------|
| <b><i>pFER::ANX1-GFP</i></b>                      | SKpromFER-attB1 |
|                                                   | promFER-R       |
|                                                   | ANX1FER-F       |
|                                                   | attB2ANX1-R     |
| <b><i>pFER::HERK1-GFP</i></b>                     | SKpromFER-attB1 |
|                                                   | promFER-R       |
|                                                   | HERK1FER-F      |
| <b><i>pFER::ANX1[ECD]-FER[ICD]-GFP</i></b>        | SKpromFER-attB1 |
|                                                   | promFER-R       |
|                                                   | ANX1FER-F       |
|                                                   | ANX1FER-R       |
|                                                   | FERIC-F         |
|                                                   | attB2FERIC-R    |
| <b><i>pFER::FER[ECD]-ANX1[ICD]-GFP</i></b>        | SKpromFER-attB1 |
|                                                   | FEREC-R         |
|                                                   | FERANX1-F       |
|                                                   | attB2ANX1-R     |
| <b><i>pFER::FER[ECD]-HERK1[ICD]-GFP</i></b>       | SKpromFER-attB1 |
|                                                   | FEREC-R         |
|                                                   | FERHERK1-F      |
|                                                   | attB2HERK1-R    |
| <b><i>pFER::FER<math>\Delta</math>ICD-GFP</i></b> | SKFER-17FattB1  |
|                                                   | SKFER-15RattB2  |
| <b><i>pFER::FER[ECD]-BRI1[ICD]-GFP</i></b>        | SKpromFER-attB1 |
|                                                   | FEREC-R         |
|                                                   | SKFERecdBRI-F   |
|                                                   | SKBRI1-attB2    |

**Supplementary Table S5: Primers used for site-directed mutagenesis**

|                |                                    |
|----------------|------------------------------------|
| SKFER-5F       | tcacgaattccgggtgcttggtgtgg         |
| SKFER-6R       | tcacggatccacagaacatctccattg        |
| SKferS695DFor  | gtagacacagttgtgaaaggaag            |
| SKferS695DRev  | tcacaactgtgtctacgtgtgtgtggtctagtg  |
| SKferS695Afor  | gtagccacagttgtgaaaggaag            |
| SKferS695Arev  | tcacaactgtggctacgtgtgtgtggtctagtg  |
| SKferT696Dfor  | gtaagcgatgttggtgaaaggaag           |
| SKferT696Drev  | tcacaacatcgcttacgtgtgtgtggtctagtg  |
| SKferT696Afor  | gtaagcgagttgtgaaaggaag             |
| SKferT696Arev  | tcacaactgcgcttacgtgtgtgtggtctagtg  |
| SKferSTDDfor   | gtagacgatgttggtgaaaggaag           |
| SKferSTDDrev   | tcacaacatcgcttacgtgtgtgtggtctagtg  |
| SKferSTAAfor   | gtagccgcagttgtgaaaggaag            |
| SKferSTAArev   | tcacaactgcgcttacgtgtgtgtggtctagtg  |
| SKferS701Dfor  | gagatttcggttatcttgaccag            |
| SKferS701Drev  | gataaccgaaatctcctttcacaactgtgcttac |
| SKferS701Afor  | gagctttcggttatcttgaccag            |
| SKferS701Arev  | gataaccgaaagctcctttcacaactgtgcttac |
| SKferSTSDDDfor | gttgtgaaaggagatttcgg               |
| SKferSTSDDDrev | atctcctttcacaacatcgcttacg          |
| SKferSTSAAAfor | gttgtgaaaggagcttcgg                |
| SKferSTSAAArev | agctcctttcacaactgcggttacg          |
| SKFERKA-F      | aaggtagccatcgagaggcaaccaatgtcc     |
| SKFERKA-R      | cgcgatggctacctttgtagttc            |
| SKFERKE-F      | aaggtagccatcgagaggcaaccaatgtcc     |
| SKFERKE-R      | ctcgatggctacctttgtagttc            |

## Supplementary References

1. Huck N, Moore JM, Federer M, Grossniklaus U (2003) The *Arabidopsis* mutant *feronia* disrupts the female gametophytic control of pollen tube reception. *Development* **130**: 2149-2159
2. Sun W, Cao Z, Li Y, Zhao YX, Zhang H (2007) A simple and effective method for protein subcellular localization using *Agrobacterium*-mediated transformation of onion epidermal cells. *Biologia* **62**: 529-532
3. Hanks SK, Hunter T (1995) Protein kinases 6. The eukaryotic protein kinase superfamily: kinase (catalytic) domain structure and classification. *FASEB J* **9**: 576-596
4. Oh MH, Ray WK, Huber SC, Asara JM, Gage DA, Clouse SD (2000) Recombinant BRASSINOSTEROID INSENSITIVE1 receptor-like kinase autophosphorylates on serine and threonine residues and phosphorylates a conserved peptide motif *in vitro*. *Plant Physiol* **124**: 751-766
5. Cao X, Li K, Suh SG, Guo T, Becraft PW (2005) Molecular analysis of the CRINKLY4 gene family in *Arabidopsis thaliana*. *Planta* **220**: 645-657
6. Gifford ML, Dean S, Ingram GC (2003) The *Arabidopsis* ACR4 gene plays a role in cell layer organisation during ovule integument and sepal margin development. *Development* **130**: 4249-4258
7. Watanabe M, Tanaka H, Watanabe D, Machida C, Machida Y (2004) The ACR4 receptor-like kinase is required for surface formation of epidermis-related tissues in *Arabidopsis thaliana*. *Plant J* **39**: 298-308
8. Matos JL, Fiori CS, Silva-Filho MC, Moura DS (2008) A conserved dibasic site is essential for correct processing of the peptide hormone AtRALF1 in *Arabidopsis thaliana*. *FEBS Lett* **582**: 3343-3347
9. Srivastava R, Liu JX, Guo H, Yin Y, Howell SH (2009) Regulation and processing of a plant peptide hormone, AtRALF23, in *Arabidopsis*. *Plant J* **59**: 930-939.
